# Supplementary material for: Transcriptomic profiling of human cardiac cells predicts protein kinase inhibitor-associated cardiotoxicity
Source: PubMed Central journal article supplement (PMC7511315; doi:10.1038/s41467-020-18396-7), 2020-09-23
Supplement: 41467_2020_18396_MOESM1_ESM.pdf [file 41467_2020_18396_MOESM1_ESM.pdf]

## **Supplementary Information**

**Transcriptomic profiling of human cardiac cells predicts protein kinase inhibitor-associated cardiotoxicity**

**van Hasselt et al.**

**Supplementary Figures 1-6**

**Supplementary Tables 1-3**

**Supplementary References**

## Supplementary Figures

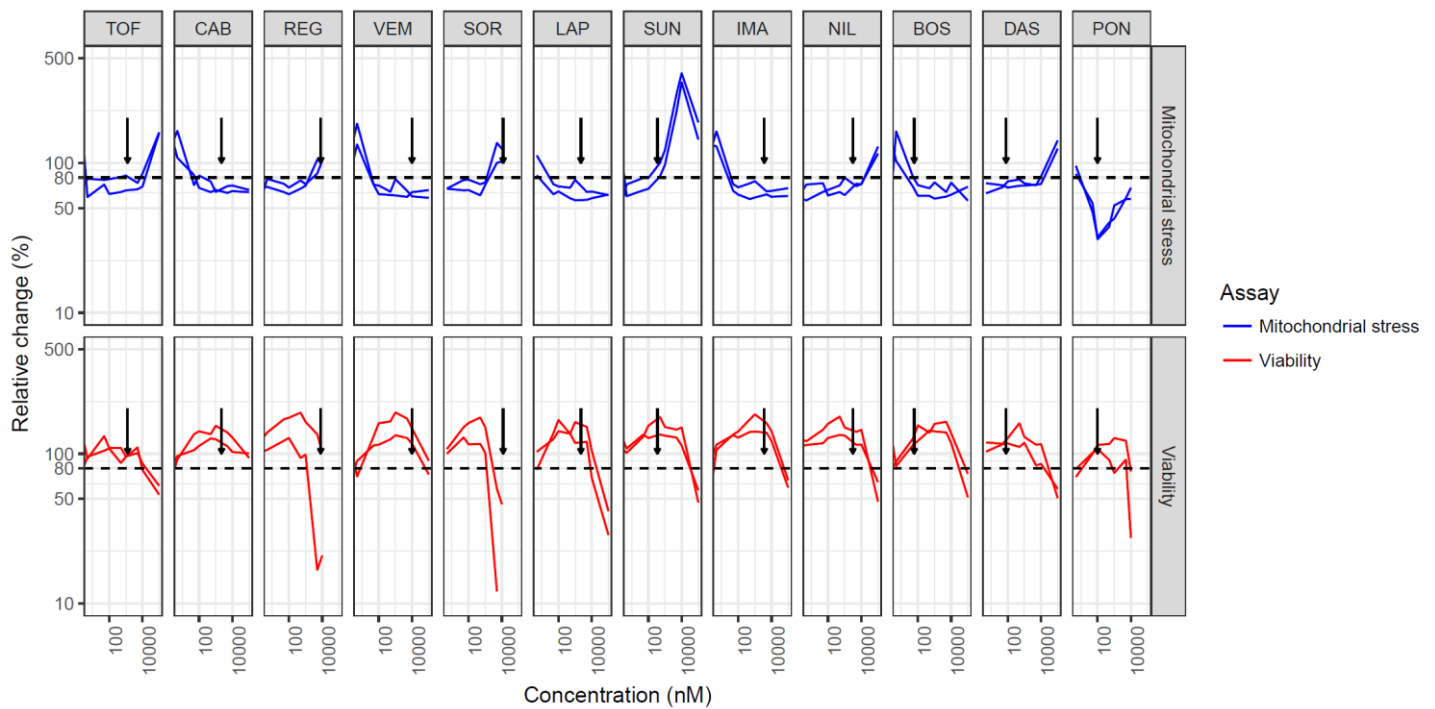

**Supplementary Figure 1.** Dose-response experiments for multiple selected kinase inhibitors sorted by FAERS-based clinical risk scores (left is low risk; right is high risk), measuring relative change from control in mitochondrial stress and viability. Therapeutic concentrations are indicated with vertical arrows.

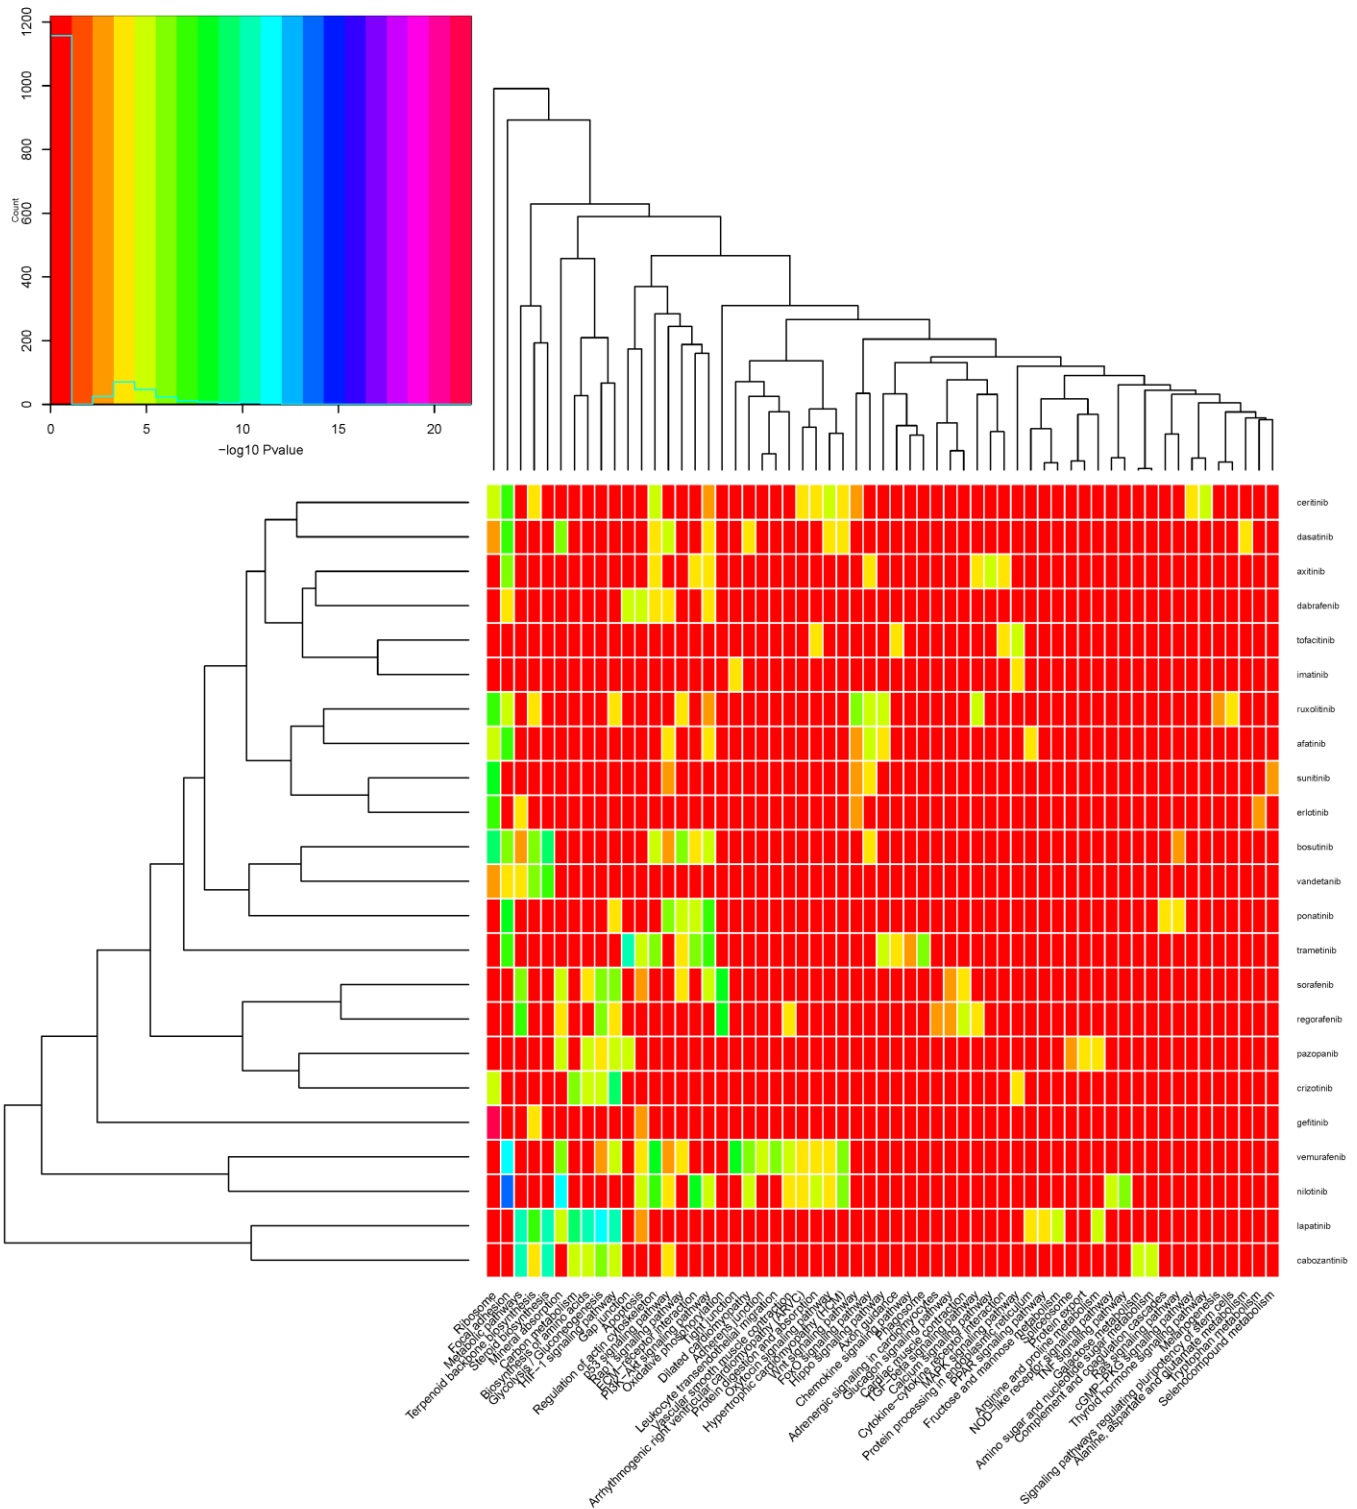

**Supplementary Figure 2.** Enrichment analysis of pathways in KEGG database for each of the 23 kinase inhibitors (KIs) across 4 PromoCell cardiomyocyte cell lines based on the top 250 genes for each KI ranked by P-value.

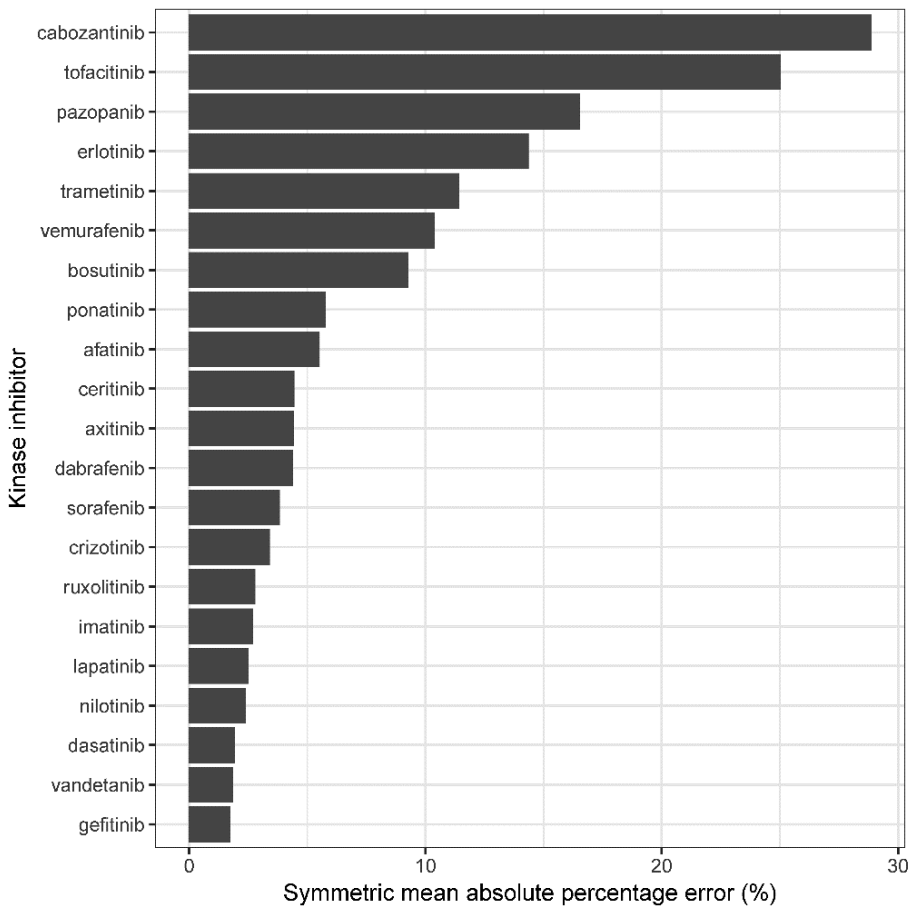

**Supplementary Figure 3.** Percentage of mean prediction error for left-out drugs during cross-validation, and intermediate proteins that are associated with the cardiotoxicity signature.

● Transcription factor   ● Intermediate protein   ● Kinase   — Phosphorylation   — PPI

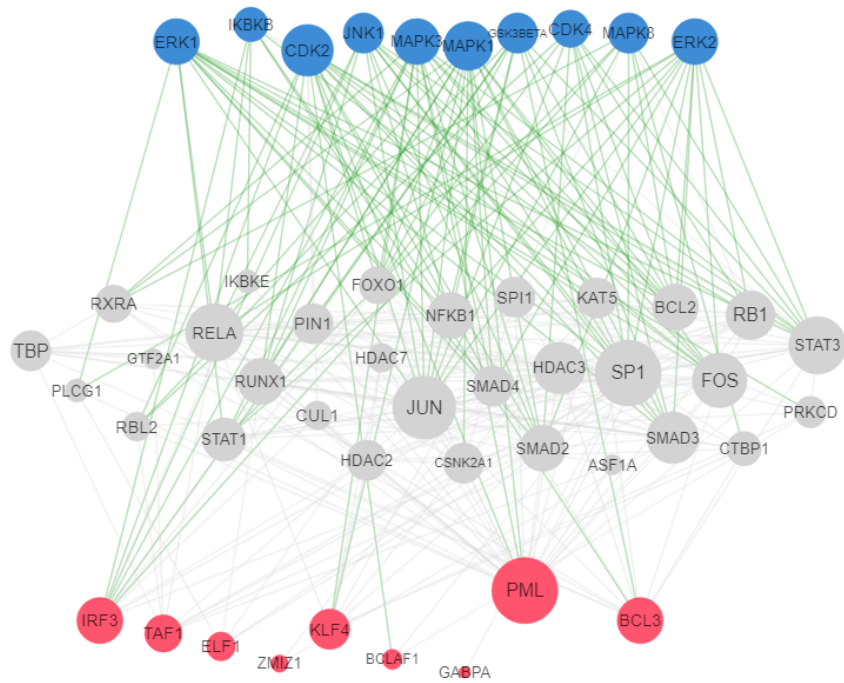

**Supplementary Figure 4.** Expression-to-kinase protein-protein interaction network analysis indicating key kinases, transcription factors

$R^2: .6263$  p-value:  $8.852e-07$

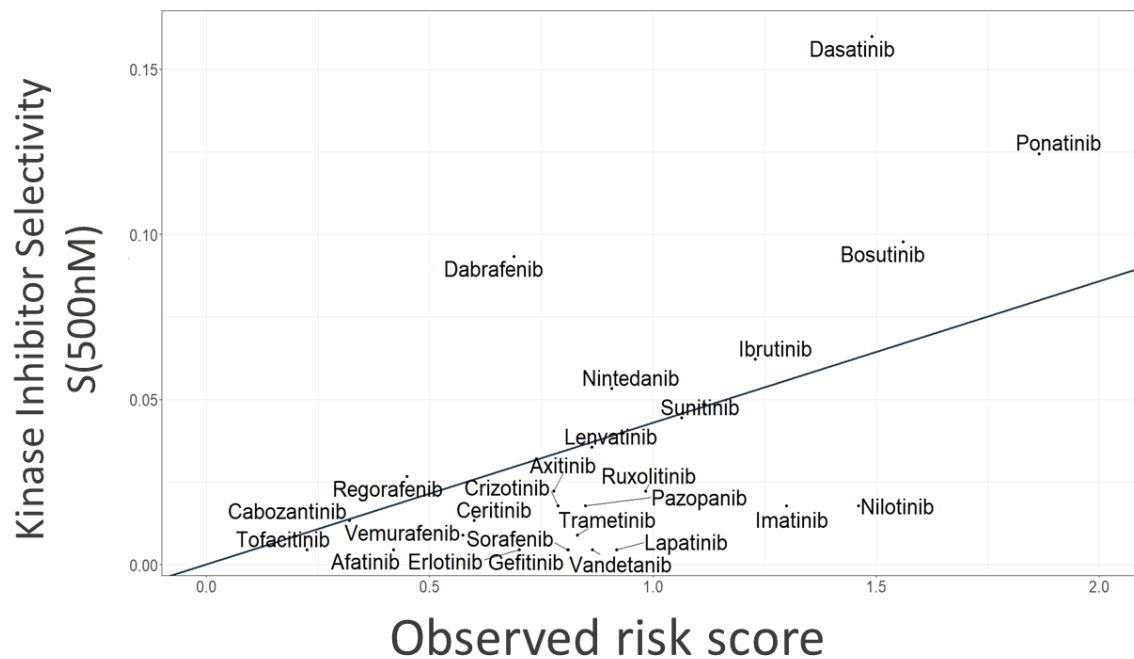

**Supplementary Figure 5.** Observed risk score vs kinase inhibitor selectivity at 500nM. The Wald statistic was used to test the association between kinase selectivity and observed risk score.

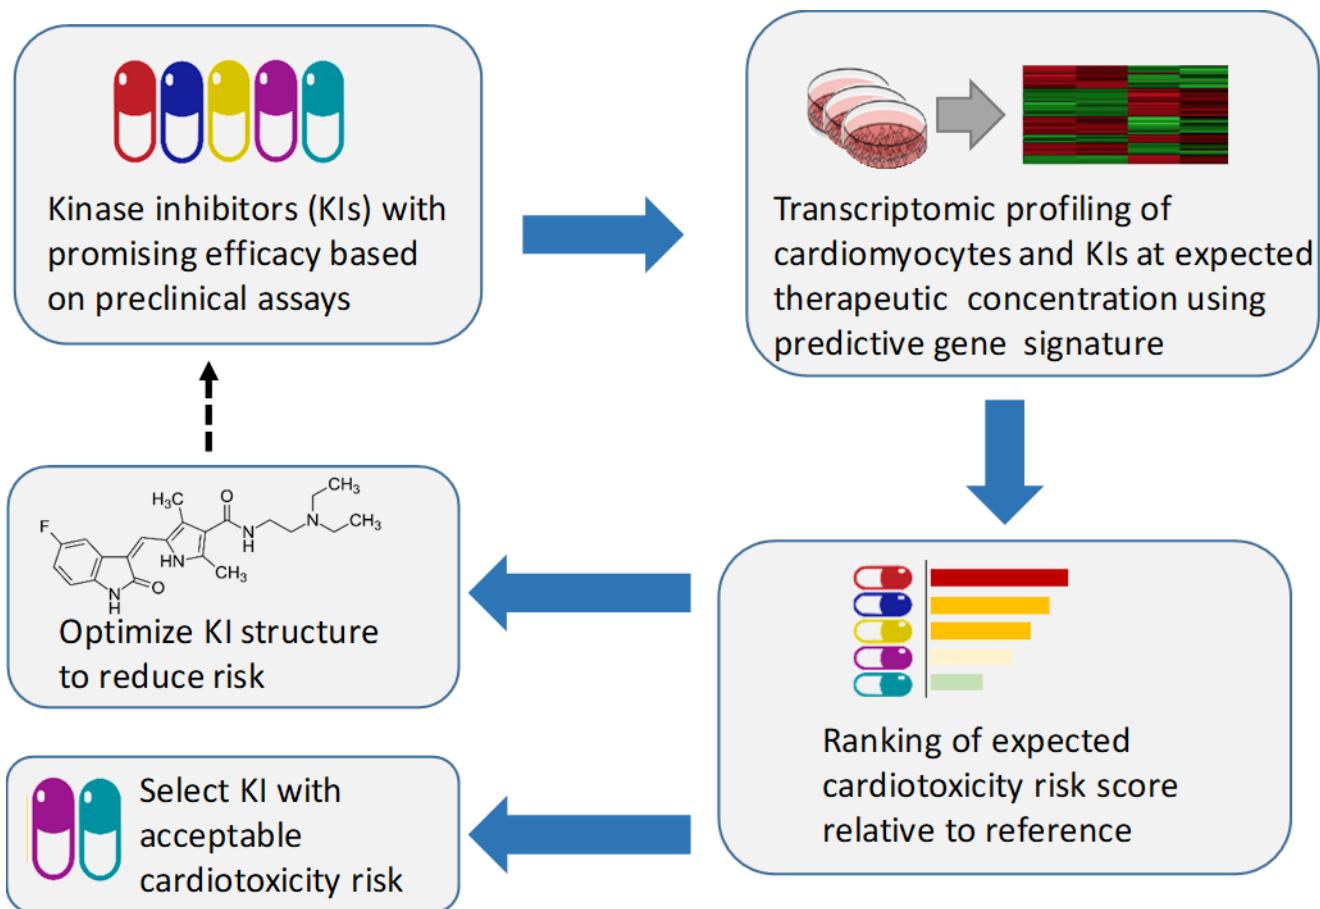

**Supplementary Figure 6.** Flowchart for implementation of transcriptomic cardiotoxicity signatures in preclinical drug development to reduce risk of cardiotoxicity.

## Supplementary Tables

**Supplementary Table 1.** Typical concentrations used for experiments (exposure for 48h). Concentrations were selected based on the mean maximum drug concentrations reported in clinical studies. For dose escalation studies the highest concentration was used. All drugs were purchased from Aldrich Market Select division of Sigma, and drug purity was confirmed by HPLC-MS analysis, as described in the SOP deposited at the DToxS website.

| <b>Drug</b>  | <b>Purity</b> | <b>In Vitro (<math>\mu\text{M}</math>)</b> | <b>Reference</b> |
|--------------|---------------|--------------------------------------------|------------------|
| Afatinib     | 98.80         | 0.05                                       | 3334             |
| Axitinib     | 98.00         | 0.2                                        | 3536             |
| Bosutinib    | 98.00         | 0.1                                        | 37               |
| Cabozantinib | 99.10         | 2                                          | 38               |
| Ceritinib    | 98.85         | 1                                          | 39               |
| Crizotinib   | 98.47         | 0.25                                       | 40               |
| Dabrafenib   | 99.61         | 2.5                                        | 4142             |
| Dasatinib    | 98.36         | 0.1                                        | 4344             |
| Erlotinib    | 99.32         | 3                                          | 4546             |
| Gefitinib    | 99.25         | 1                                          | 47               |
| Imatinib     | 99.48         | 5                                          | 48               |
| Lapatinib    | 99.00         | 2                                          | 49               |
| Nilotinib    | 99.77         | 3                                          | 5051             |
| Pazopanib    | 96.13         | 10                                         | 52               |
| Ponatinib    | 97.29         | 0.1                                        | 53               |
| Regorafenib  | 99.58         | 1                                          | 54               |
| Ruxolitinib  | 99.38         | 1                                          | 5556             |
| Sorafenib    | 99.73         | 0.5                                        | 57               |
| Sunitinib    | 97.13         | 1                                          | 5859             |
| Trametinib   | 99.24         | 0.1                                        | 60               |
| Tofacitinib  | 99.85         | 1                                          | 61               |
| Vandetanib   | 99.73         | 0.333                                      | 62               |
| Vemurafenib  | 98.08         | 2                                          | 63               |



**Supplementary Table 2.** Overview of heart cell perturbation experiments across drugs, cell lines, plates, and numbers of replicates per experiment for which mRNAseq profiling data was included in this analysis.

| Drug         | Nr. of cell lines <sup>a</sup> | Nr. of plates <sup>b</sup> | Number of Biological replicates/cell line |         |
|--------------|--------------------------------|----------------------------|-------------------------------------------|---------|
|              |                                |                            | Minimum                                   | Maximum |
| Afatinib     | 4                              | 2                          | 3                                         | 4       |
| Axitinib     | 4                              | 1                          | 4                                         | 4       |
| Bosutinib    | 4                              | 2                          | 4                                         | 4       |
| Cabozantinib | 3                              | 1                          | 3                                         | 4       |
| Ceritinib    | 4                              | 2                          | 3                                         | 4       |
| Crizotinib   | 4                              | 1                          | 4                                         | 4       |
| Dabrafenib   | 4                              | 1                          | 3                                         | 4       |
| Dasatinib    | 4                              | 2                          | 3                                         | 4       |
| Erlotinib    | 4                              | 2                          | 3                                         | 4       |
| Gefitinib    | 4                              | 1                          | 4                                         | 4       |
| Imatinib     | 4                              | 1                          | 3                                         | 4       |
| Lapatinib    | 2                              | 1                          | 4                                         | 4       |
| Nilotinib    | 4                              | 1                          | 3                                         | 4       |
| Pazopanib    | 4                              | 2                          | 3                                         | 4       |
| Ponatinib    | 4                              | 2                          | 3                                         | 4       |
| Regorafenib  | 3                              | 2                          | 3                                         | 4       |
| Ruxolitinib  | 4                              | 2                          | 3                                         | 4       |
| Sorafenib    | 3                              | 3                          | 3                                         | 4       |
| Sunitinib    | 4                              | 3                          | 3                                         | 5       |
| Tofacitinib  | 4                              | 2                          | 3                                         | 4       |
| Trametinib   | 4                              | 2                          | 3                                         | 4       |
| Vandetanib   | 4                              | 2                          | 4                                         | 4       |
| Vemurafenib  | 4                              | 2                          | 3                                         | 4       |

<sup>a</sup>Derived from different human donors.

<sup>b</sup>In most cases drug perturbation experiments were conducted on multiple plates that were processed in a single RNAseq-run, in order to limit the influence of potential batch-effects.

**Supplementary Table 3.** List of 26 genes part of the cardiotoxicity gene signature.

| <b>Coefficient</b> | <b>Estimate</b> |
|--------------------|-----------------|
| (Intercept)        | 0.71042676      |
| PRKRIP1            | 0.2087493       |
| DDX3Y              | -0.14451405     |
| RPL13P5            | -0.10065338     |
| DHRS4              | 0.08840433      |
| ZNF567             | -0.19108461     |
| SCO1               | 0.22498281      |
| ZSCAN25            | 0.30633667      |
| ZNF776             | 0.20654469      |
| SNX14              | -0.22973802     |
| ZNF611             | -0.06748435     |
| MFN2               | 0.56373084      |
| DSTNP2             | -0.16016064     |
| PMS2               | 0.18801529      |
| NFATC2IP           | -0.16092359     |
| UBE2Q2             | -0.44148014     |
| ARHGAP12           | -0.25426077     |
| TBC1D16            | -0.02704898     |
| FAM45BP            | 0.33178699      |
| GOLPH3L            | -0.12777427     |
| BCAT2              | 0.10332328      |
| URM1               | 0.31541242      |
| CSE1L              | 0.17069461      |
| DNAJB14            | 0.46071526      |
| SNORD47            | -0.03746744     |
| CASK               | -0.08538788     |
| FASTKD2            | 0.31397776      |

## Supplementary References

1. Schnell D, Buschke S, Fuchs H, et al (2014) Pharmacokinetics of afatinib in subjects with mild or moderate hepatic impairment. *Cancer ChemotherPharmacol* 74:267–75. doi: 10.1007/s00280-014-2484-y
2. Stopfer P, Marzin K, Narjes H, et al (2012) Afatinib pharmacokinetics and metabolism after oral administration to healthy male volunteers. *Cancer ChemotherPharmacol* 69:1051–61. doi: 10.1007/s00280-011-1803-9
3. Pithavala YK, Chen Y, Toh M, et al (2012) Evaluation of the effect of food on the pharmacokinetics of axitinib in healthy volunteers. *Cancer ChemotherPharmacol* 70:103–12. doi: 10.1007/s00280-012-1888-9
4. Rugo HS, Herbst RS, Liu G, et al (2005) Phase I trial of the oral antiangiogenesis agent AG-013736 in patients with advanced solid tumors: pharmacokinetic and clinical results. *J Clin Oncol* 23:5474–83. doi: 10.1200/JCO.2005.04.192
5. Abbas R, Hug BA, Leister C, et al (2012) A phase I ascending single-dose study of the safety, tolerability, and pharmacokinetics of bosutinib (SKI-606) in healthy adult subjects. *Cancer ChemotherPharmacol* 69:221–7. doi: 10.1007/s00280-011-1688-7
6. Kurzrock R, Sherman SI, Ball DW, et al (2011) Activity of XL184 (Cabozantinib), an oral tyrosine kinase inhibitor, in patients with medullary thyroid cancer. *J Clin Oncol* 29:2660–6. doi: 10.1200/JCO.2010.32.4145
7. Shaw AT, Kim D-W, Mehra R, et al (2014) Ceritinib in ALK-rearranged non-small-cell lung cancer. *N Engl J Med* 370:1189–97. doi: 10.1056/NEJMoa1311107
8. Kwak E, Camidge D, Clark J, et al (2009) Clinical activity observed in a phase I dose escalation trial of an oral c-MET and ALK inhibitor. *J Clin Oncol* 27:
9. Ouellet D, Gibiansky E, Leonowens C, et al (2014) Population pharmacokinetics of dabrafenib, a BRAF inhibitor: effect of dose, time, covariates, and relationship with its metabolites. *J ClinPharmacol* 54:696–706. doi: 10.1002/jcph.263
10. Falchook GS, Long G V, Kurzrock R, et al (2012) Dabrafenib in patients with melanoma, untreated brain metastases, and other solid tumours: a phase 1 dose-escalation trial. *Lancet (London, England)* 379:1893–901. doi: 10.1016/S0140-6736(12)60398-5
11. Dai CL, Tiwari AK, Wu CP, et al (2008) Lapatinib (Tykerb, GW572016) reverses multidrug resistance in cancer cells by inhibiting the activity of ATP-binding cassette subfamily B member 1 and G member 2. *Cancer Res* 68:7905–7914. doi: 10.1158/0008-5472.CAN-08-0499
12. McCaig AM, Cosimo E, Leach MT, Michie AM (2012) Dasatinib inhibits CXCR4 signaling in chronic lymphocytic leukaemia cells and impairs migration towards CXCL12. *PLoS One* 7:e48929. doi: 10.1371/journal.pone.0048929
13. Herbst RS, Prager D, Hermann R, et al (2005) TRIBUTE: A phase III trial of erlotinib hydrochloride (OSI-774) combined with carboplatin and paclitaxel chemotherapy in advanced non-small-cell lung cancer. *J Clin Oncol* 23:5892–5899. doi: 10.1200/JCO.2005.02.840
14. Soulieres D, Senzer NN, Vokes EE, et al (2004) Multicenter phase II study of erlotinib, an oral epidermal growth factor receptor tyrosine kinase inhibitor, in patients with recurrent or metastatic squamous cell cancer of the head and neck. *J Clin Oncol* 22:77–85. doi: 10.1200/JCO.2004.06.075
15. Hirano S, Sano K, Takeda Y, et al (2012) The pharmacokinetics and long-term therapeutic effects of gefitinib in patients with lung adenocarcinoma harboring the epidermal growth factor receptor(EGFR)mutation. *Gan To Kagaku Ryoho* 39:1501–6.
16. Demetri GD, Wang Y, Wehrle E, et al (2009) Imatinib plasma levels are correlated with clinical benefit in patients with unresectable/metastatic gastrointestinal stromal tumors. *J Clin Oncol* 27:3141–3147. doi: 10.1200/JCO.2008.20.4818
17. LoRusso PM, Jones SF, Koch KM, et al (2008) Phase I and pharmacokinetic study of lapatinib and docetaxel in patients with advanced cancer. *J Clin Oncol* 26:3051–6. doi: 10.1200/JCO.2007.14.9633

18. Trent J, Molimard M (2011) Pharmacokinetics and pharmacodynamics of nilotinib in gastrointestinal stromal tumors. *Semin Oncol* 38 Suppl 1:S28–33. doi: 10.1053/j.seminoncol.2011.01.014
19. Tanaka C, Yin OQP, Sethuraman V, et al (2010) Clinical pharmacokinetics of the BCR-ABL tyrosine kinase inhibitor nilotinib. *ClinPharmacolTher* 87:197–203. doi: 10.1038/clpt.2009.208
20. Hurwitz HI, Dowlati A, Saini S, et al (2009) Phase I Trial of Pazopanib in Patients with Advanced Cancer rial of Pazopanib in Patients with Advanced Cancer. 4220–4227. doi: 10.1158/1078-0432.CCR-08-2740
21. Narasimhan NI, Dorer DJ, Niland K, et al (2013) Effects of ketoconazole on the pharmacokinetics of ponatinib in healthy subjects. *J ClinPharmacol* 53:974–81. doi: 10.1002/jcph.109
22. Rey J-B, Launay-Vacher V, Tournigand C (2015) Regorafenib as a single-agent in the treatment of patients with gastrointestinal tumors: an overview for pharmacists. *Target Oncol* 10:199–213. doi: 10.1007/s11523-014-0333-x
23. Shi JG, Chen X, McGee RF, et al (2011) The pharmacokinetics, pharmacodynamics, and safety of orally dosed INCB018424 phosphate in healthy volunteers. *J ClinPharmacol* 51:1644–54. doi: 10.1177/0091270010389469
24. Chen X, Shi JG, Emm T, et al (2014) Pharmacokinetics and pharmacodynamics of orally administered ruxolitinib (INCB018424 phosphate) in renal and hepatic impairment patients. *ClinPharmacol drug Dev* 3:34–42. doi: 10.1002/cpdd.77
25. Abou-Alfa GK, Schwartz L, Ricci S, et al (2006) Phase II study of sorafenib in patients with advanced hepatocellular carcinoma. *J Clin Oncol* 24:4293–300. doi: 10.1200/JCO.2005.01.3441
26. Minkin P, Zhao M, Chen Z, et al (2008) Quantification of sunitinib in human plasma by high-performance liquid chromatography-tandem mass spectrometry. *J Chromatogr B Anal Technol Biomed Life Sci* 874:84–88. doi: 10.1016/j.jchromb.2008.09.007
27. Faivre S, Delbaldo C, Vera K, et al (2006) Safety, pharmacokinetic, and antitumor activity of SU11248, a novel oral multitarget tyrosine kinase inhibitor, in patients with cancer. *J Clin Oncol* 24:25–35. doi: 10.1200/JCO.2005.02.2194
28. Kim KB, Kefford R, Pavlick AC, et al (2013) Phase II study of the MEK1/MEK2 inhibitor Trametinib in patients with metastatic BRAF-mutant cutaneous melanoma previously treated with or without a BRAF inhibitor. *J Clin Oncol* 31:482–9. doi: 10.1200/JCO.2012.43.5966
29. Dowty ME, Lin J, Ryder TF, et al (2014) The pharmacokinetics, metabolism, and clearance mechanisms of tofacitinib, a janus kinase inhibitor, in humans. *Drug MetabDispos* 42:759–73. doi: 10.1124/dmd.113.054940
30. Martin P, Oliver S, Robertson J, et al (2011) Pharmacokinetic drug interactions with vandetanib during coadministration with rifampicin or itraconazole. *Drugs R D* 11:37–51. doi: 10.2165/11586980-000000000-00000
31. Grippo JF, Zhang W, Heinzmann D, et al (2014) A phase I, randomized, open-label study of the multiple-dose pharmacokinetics of vemurafenib in patients with BRAF V600E mutation-positive metastatic melanoma. *Cancer ChemotherPharmacol* 73:103–11. doi: 10.1007/s00280-013-2324-5
32. DtoxS web site: [www.dtoxS.org](http://www.dtoxS.org)
